# Supplementary material for: Effect of dapagliflozin alone and in combination with insulin in a rat model of type 1 diabetes
Source: PubMed Central journal article supplement — J Vet Med Sci. 2020 Mar 11;82(4):467–74. doi: 10.1292/jvms.19-0450 (PMC7192721; doi:10.1292/jvms.19-0450), 2020-03-11
Supplement: jvms-82-467-s001.pdf [file jvms-82-467-s001.pdf]

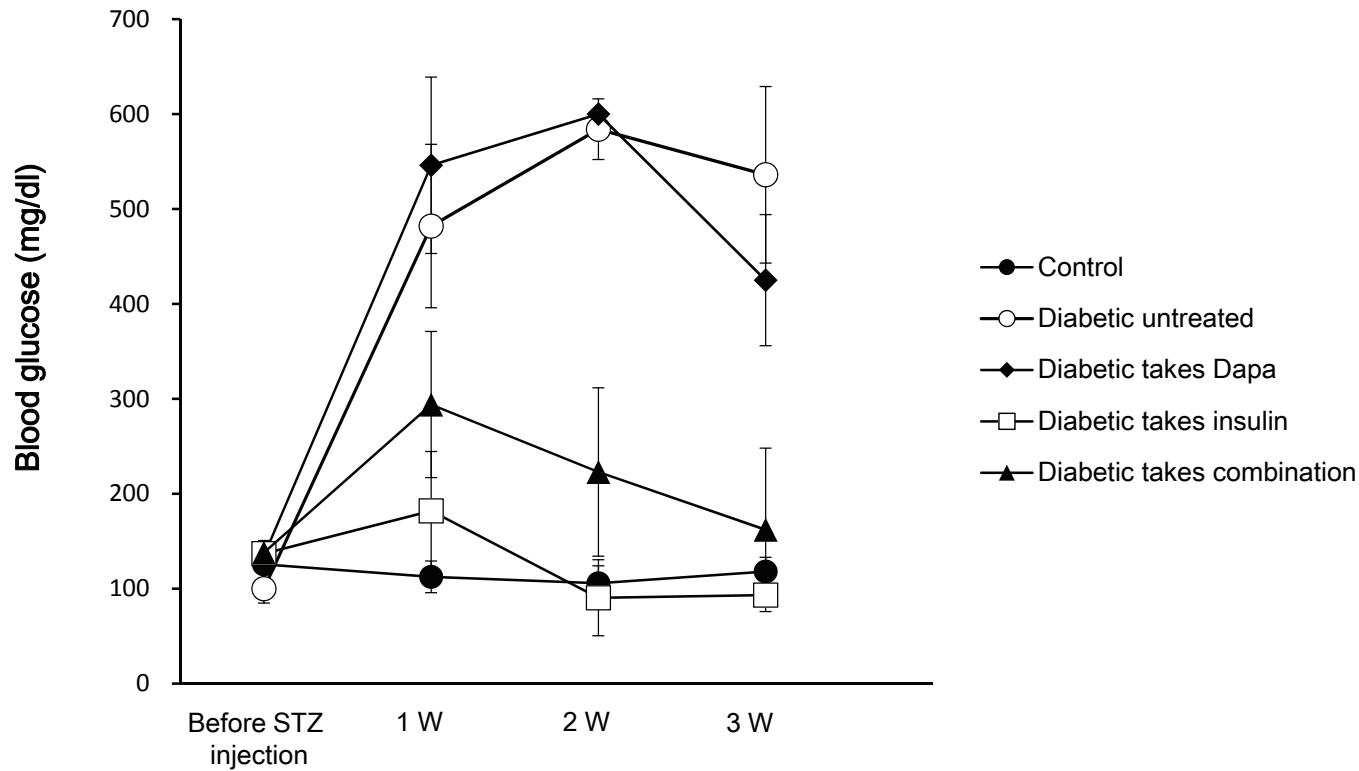

Supplementary Fig. 1.

Weekly glucose measurements to evaluate the hypoglycemic effect of treatment using dapagliflozin (0.1 mg/kg) alone, insulin (3-5U/rat) alone, or a combination of dapagliflozin (0.1 mg/kg) and insulin (1.5-2.5U/rat) in the 3-week study. Values are expressed as mean  $\pm$  standard deviation.

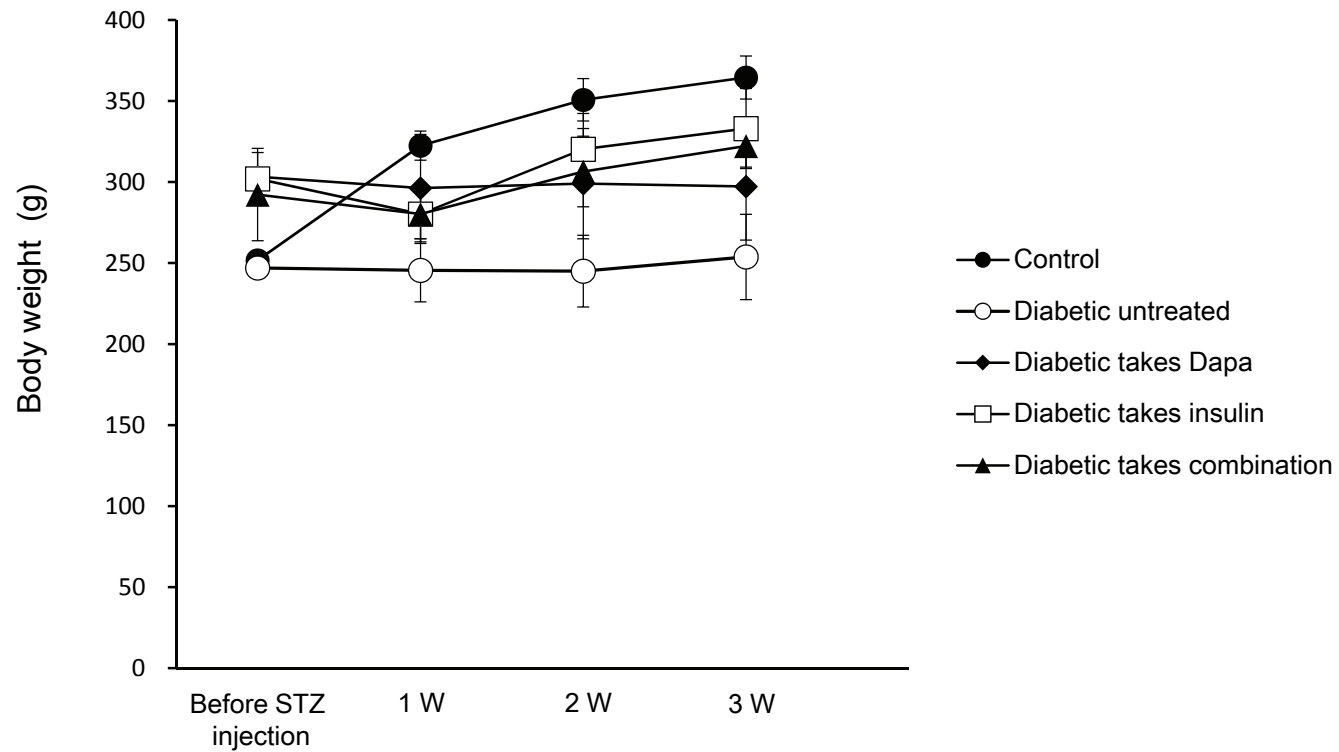

Supplementary Fig. 2.

Weekly body weight measurements to evaluate the hypoglycemic effect of treatment using dapagliflozin (0.1 mg/kg) alone, insulin (3-5U/rat) alone, or a combination of dapagliflozin (0.1 mg/kg) and insulin (1.5-2.5U/rat) in the 3-week study. Values are expressed as mean  $\pm$  standard deviation.
